# Supplementary material for: Lung Function in Fontan Patients Over a Ten-Year Period: Is the Fontan Circulation Impairing Lung Development?
Source: Springer Nature journal article supplement (doi:10.1007/s00246-023-03389-2), 2024-01-25
Supplement: MOESM1 [file 26661680]

**Supplementary Table 1.** Results from spirometry, lung volume, and DLCO<sub>10s</sub> in PFT-I and PFT-II, presented as median percent predicted (%pred). Patients are categorized into a pediatric (under 18 years at PFT-I) and an adult group (18 years or older at PFT-I). All %pred values are calculated with the GLI calculator. The  $\Delta$  value indicates the change from PFT-I to PFT-II.

|                           | Pediatric group<br>(n=32) |                   |                   |                  | Adult group<br>(n=16) |                   |                 |       |
|---------------------------|---------------------------|-------------------|-------------------|------------------|-----------------------|-------------------|-----------------|-------|
|                           | PFT-I<br>%pred            | PFT-II<br>%pred   | $\Delta$          | p                | PFT-I<br>%pred        | PFT-II<br>%pred   | $\Delta$        | p     |
| <b>FEV1</b>               | 99.7 (92.4, 104.4)        | 89.3 (84.9,97.2)  | -7.3 (-14.4,-2.7) | <b>&lt;0.001</b> | 84.2 (79.1,91.4)      | 87.1 (78.7,97.3)  | 0.8 (-8.1,6.8)  | 0.793 |
| <b>FVC</b>                | 98.3(87.8,106.1)          | 96.7(86.7,100.6)  | -5.8(-8.9,-0.3)   | <b>0.008</b>     | 87.9 (82.7,92.7)      | 89.9 (83.3,100.2) | 3.8 (-5.6,7.2)  | 0.298 |
| <b>FEV1/FVC</b>           | 100.7 (96.7,105.2)        | 96.9 (93.8,100.7) | -4.8 (-6.7, -1.1) | <b>&lt;0.001</b> | 100.4<br>(93.8,104.6) | 101 (93.1,102.3)  | -2.3 (-5.5,0.3) | 0.065 |
| <b>DLCO<sub>10s</sub></b> | 71.4 (62.1,81.6)          | 69.1 (52.8,77.8)  | -5.2 (-13.6,4.6)  | 0.062            | 70.2 (52.4,74.5)      | 68.8 (56.7,76.3)  | 3.6 (-8.2,13.8) | 0.562 |
| <b>DLCO/VA</b>            | 74.5 (69.6,84.5)          | 81.9 (66.4,87.9)  | 2.1 (-5.9,14)     | 0.477            | 81 (62.6,89.8)        | 83.2 (75.1,92.7)  | 1.5 (-8.9,18.4) | 0.274 |
| <b>VA</b>                 | 95.5 (89.5,101.6)         | 89.5 (79.7,93.2)  | -8.7 (-16.3,-3.1) | <b>&lt;0.001</b> | 85.1 (78.7,90.1)      | 78.5 (74.6,92.6)  | -3.9 (-9.2,0.2) | 0.175 |

Data are presented as median (IQR)

FEV1 (forced expiratory volume in 1 second; FVC (forced vital capacity); DLCO<sub>10s</sub> (diffusing Capacity for Carbon Monoxide 10 seconds); DLCO/VA (DLCO corrected for alveolar volume); VA (alveolar volume)

**Supplementary Table 2.** Results from the single-breath determination of nitric oxide uptake (DLNO) in PFT-I and PFT-II in the adult group, presented as percent predicted (%pred). All %pred values were calculated using the reference equations published in the ERS task force report by Zavorsky et al. [21]

| Adult group<br>n = 16    | PFT-I              | PFT-II            | $\Delta$            | p                   |
|--------------------------|--------------------|-------------------|---------------------|---------------------|
| <b>DLNO</b>              | 58.4 (53.3, 63.5)  | 53.7 (44.1, 57.3) | -7.7 (-10.6, 0.1)   | <b>0.005</b>        |
| <b>DLCO<sub>5s</sub></b> | 63.1 (49.2, 72.6)  | 54.2 (49.1, 63.3) | -3.9 (-12.2, 0.9)   | 0.051               |
| <b>DLNO/VA</b>           | 82.4 (77.3, 99.6)  | 78.3 (71.6, 82.1) | -9 (-20.6, -2)      | <b>0.006</b>        |
| <b>DLCO/VA</b>           | 81.3 (73.9, 102.0) | 75.9 (62.7, 84.2) | -10 (-24.2, 4.3)    | 0.058               |
| <b>VA</b>                | 77.1 (70.9, 83.3)  | 74.0 (70.2, 87)   | -2.1 (-6.3, 3.4)    | 0.597               |
| <b>Dm</b>                | 49.1 (43.9, 56.3)  | 39.6 (31.6, 42.1) | -12.6 (-15.1, -7.7) | <b>p &lt; 0.001</b> |
| <b>Vc</b>                | 64.4 (54.1, 85.9)  | 60.7 (57.8, 79.8) | 3.6 (-5.5, 7.3)     | 0.706               |
| <b>DLNO/DLCO ratio</b>   | 4.6 (4.3, 4.8)     | 4.3 (4.1, 4.4)    | -0.3 (-0.5, 0)      | 0.083               |

Data are expressed as median (IQR).

DLNO (diffusing capacity for nitric oxide); DLCO<sub>5s</sub> (diffusing capacity for the lungs of carbon monoxide - 5 seconds measurement; KNO (transfer coefficient of the lung for nitric oxide); KCO (transfer coefficient of the lung for carbon monoxide); VA (alveolar volume); Dm (membrane diffusing capacity); Vc (capillary blood volume).

**Supplementary Table 3.** Simple regression models investigating the relationship between percent predicted (%pred) PFT measurements in PFT-II and clinical characteristics. The %pred values were calculated with the GLI calculator for FEV1, FVC, VA, and DLCO, and with the reference equation provided by Zavorsky et al. for DLNO.

|                                 | FEV1 %pred    |       | FVC %pred     |       | VA %pred      |       | DLCO <sub>10s</sub> %pred |       | DLNO %pred    |              |
|---------------------------------|---------------|-------|---------------|-------|---------------|-------|---------------------------|-------|---------------|--------------|
|                                 | Estimate ± SD | P     | Estimate ± SD | P     | Estimate ± SD | P     | Estimate ± SD             | P     | Estimate ± SD | P            |
| <b>n = 48</b>                   |               |       |               |       |               |       |                           |       |               |              |
| <b>Sex</b>                      |               |       |               |       |               |       |                           |       |               |              |
| Reference: Male                 |               |       |               |       |               |       |                           |       |               |              |
| Female                          | 6.17 ± 3.11   | 0.054 | 1.62 ± 3.40   | 0.636 | 0.45 ± 3.34   | 0.983 | 4.15 ± 4.15               | 0.322 | 4.73 ± 3.04   | 0.126        |
| <b>Age</b>                      | 0.03 ± 0.25   | 0.912 | -0.05 ± 0.27  | 0.860 | 0.02 ± 0.26   | 0.948 | 0.43 ± 0.32               | 0.186 | -0.50 ± 0.23  | <b>0.035</b> |
| <b>Ventricular morphology</b>   |               |       |               |       |               |       |                           |       |               |              |
| Reference: Left ventricle       |               |       |               |       | -1.10 ±       |       |                           |       |               |              |
| Right ventricle                 | 5.78 ± 3.12   | 0.072 | 1.68 ± 3.40   | 0.624 | 3.35          | 0.744 | -3.76 ± 4.16              | 0.370 | -2.67 ± 3.09  | 0.392        |
| <b>Age at Fontan completion</b> |               |       |               |       |               |       |                           |       |               |              |
| Reference: < 5 years            |               |       |               |       | -1.67 ±       |       |                           |       |               |              |
| > 5 years                       | 4.88 ± 3.37   | 0.155 | 2.75 ± 3.60   | 0.450 | 3.56          | 0.641 | 7.43 ± 4.33               | 0.093 | -1.07 ± 3.32  | 0.759        |
| <b>Fontan type</b>              |               |       |               |       |               |       |                           |       |               |              |
| Reference: Extracardiac tunnel  |               |       |               |       |               |       |                           |       |               |              |
| Lateral tunnel/Classical Fontan | 0.87 ± 3.45   | 0.802 | -0.07 ± 3.62  | 0.985 | 4.48 ± 3.44   | 0.200 | -2.32 ± 4.37              | 0.598 | -7.61 ± 3.06  | <b>0.016</b> |
| <b>%pred VO<sub>2peak</sub></b> | 0.05 ± 0.16   | 0.747 | 0.13 ± 0.16   | 0.424 | 0.16 ± 0.16   | 0.320 | 0.20 ± 0.20               | 0.324 | 0.45 ± 0.13   | <b>0.001</b> |

FEV1 (forced expiratory volume in 1 second; %pred (percent predicted); FVC (forced vital capacity); VA (alveolar volume); DLCO<sub>10s</sub> (diffusing Capacity for Carbon Monoxide, 10 seconds measurement); DLNO (diffusing capacity for Nitric Oxide)
